# Supplementary material for: Indicators of Data Quality at the Cancer Registry Zurich and Zug in Switzerland
Source: Biomed Res Int. 2018 Jun 13;2018:7656197. doi: 10.1155/2018/7656197 (PMC6020656; doi:10.1155/2018/7656197)
Supplement: Supplementary Materials — Supplementary Material Table 1: Comparison of number of cases registered for selected types of cancer as published in different annual reports, Cancer Registry Zurich and Zug, Switzerland. [file 7656197.f1.docx]

Supplementary Material Table 1. Comparison of number of cases registered for selected types of cancer as published in different annual reports, Cancer Registry Zurich and Zug, Switzerland

| **Localisation** | **ICD10** | **Incidence year** | **Annual report 2014**1) | **Annual report 2015**2) | **Annual report 2016**3) | **Diff. 2014-2015** | **%** | **Diff. 2015-2016** | **%** |
| --- | --- | --- | --- | --- | --- | --- | --- | --- | --- |
| **Men** |  |  |  |  |  |  |  |  |  |
| Prostate | C61 | 2012 | 942 | 985 | 997 | 43 | **4.4** | 12 | 1.2 |
|  | C61 | 2013 |  | 925 | 953 |  |  | 28 | **2.9** |
| Lung | C33-C34 | 2012 | 423 | 433 | 435 | 10 | **2.3** | 2 | 0.5 |
|  | C33-C34 | 2013 |  | 393 | 403 |  |  | 10 | **2.5** |
| Colon/Rectum | C18-C20 | 2012 | 361 | 372 | 377 | 11 | **3.0** | 5 | 1.3 |
|  | C18-C20 | 2013 |  | 381 | 389 |  |  | 8 | **2.1** |
| Melanoma | C43 | 2012 | 329 | 330 | 334 | 1 | **0.3** | 4 | 1.2 |
|  | C43 | 2013 |  | 295 | 297 |  |  | 2 | **0.7** |
| Leukaemia | C91-C95 | 2012 | 78 | 87 | 93 | 9 | **10.3** | 6 | 6.5 |
|  | C91-C95 | 2013 |  | 89 | 95 |  |  | 6 | **6.3** |
| Pancreas | C25 | 2012 | 104 | 106 | 106 | 2 | **1.9** | 0 | 0.0 |
|  | C25 | 2013 |  | 116 | 118 |  |  | 2 | **1.7** |
| Liver | C22 | 2012 | 86 | 89 | 91 | 3 | **3.4** | 2 | 2.2 |
|  | C22 | 2013 |  | 68 | 75 |  |  | 7 | **9.3** |
| Urinary tract | C64-C66, C68 | 2012 | 85 | 88 | 90 | 3 | **3.4** | 2 | 2.2 |
|  | C64-C66, C68 | 2013 |  | 119 | 125 |  |  | 6 | **4.8** |
| Bladder | C67 | 2012 | 166 | 170 | 172 | 4 | **2.4** | 2 | 1.2 |
|  | C67 | 2013 |  | 149 | 151 |  |  | 2 | **1.3** |
| **Women** |  |  |  |  |  |  |  |  |  |
| Breast | C50 | 2012 | 1101 | 1107 | 1114 | 6 | **0.5** | 7 | 0.6 |
|  | C50 | 2013 |  | 1034 | 1054 |  |  | 20 | **1.9** |
| Lung | C33-C34 | 2012 | 281 | 290 | 295 | 9 | **3.1** | 5 | 1.7 |
|  | C33-C34 | 2013 |  | 293 | 306 |  |  | 13 | **4.2** |
| Colon/Rectum | C18-C20 | 2012 | 306 | 313 | 315 | 7 | **2.2** | 2 | 0.6 |
|  | C18-C20 | 2013 |  | 341 | 344 |  |  | 3 | **0.9** |
| **Localisation** | **ICD10** | **Incidence year** | **Annual report 2014**1) | **Annual report 2015**2) | **Annual report 2016**3) | **Diff. 2014-2015** | **%** | **Diff. 2015-2016** | **%** |
| Melanoma | C43 | 2012 | 275 | 277 | 279 | 2 | **0.7** | 2 | 0.7 |
|  | C43 | 2013 |  | 258 | 261 |  |  | 3 | **1.1** |
| Leukaemia | C91-C95 | 2012 | 73 | 81 | 84 | 8 | **9.9** | 3 | 3.6 |
|  | C91-C95 | 2013 |  | 77 | 80 |  |  | 3 | **3.8** |
| Pancreas | C25 | 2012 | 116 | 120 | 121 | 4 | **3.3** | 1 | 0.8 |
|  | C25 | 2013 |  | 125 | 131 |  |  | 6 | **4.6** |
| Liver | C22 | 2012 | 40 | 43 | 44 | 3 | **7.0** | 1 | 2.3 |
|  | C22 | 2013 |  | 45 | 48 |  |  | 3 | **6.3** |
| Urinary tract | C64-C66, C68 | 2012 | 60 | 62 | 64 | 2 | **3.2** | 2 | 3.1 |
|  | C64-C66, C68 | 2013 |  | 71 | 72 |  |  | 1 | **1.4** |
| Bladder | C67 | 2012 | 52 | 55 | 56 | 3 | **5.5** | 1 | 1.8 |
|  | C67 | 2013 |  | 47 | 47 |  |  | 0 | **0.0** |
| **Men and women** |  |  |  |  |  |  |  |  |  |
| All tumours | C00-C97 (except C44) | 2012 | 6883 | 7055 | 7154 | 172 | **2.4** | 99 | 1.4 |
|  |  | 2013 |  | 6856 | 7046 |  |  | 190 | **2.7** |

1) published in spring 2015, reports mainly on incidence year 2012

2) published in spring 2016, reports mainly on incidence year 2013

3) published in spring 2017, reports mainly on incidence year 2014
